# Supplementary material
Source: PubMed Central journal article supplement (PMC4267342)
Supplement: pnas.201405981SI.pdf [file pnas.201405981SI.pdf]

# Supporting Information

Chen et al. 10.1073/pnas.1405981111

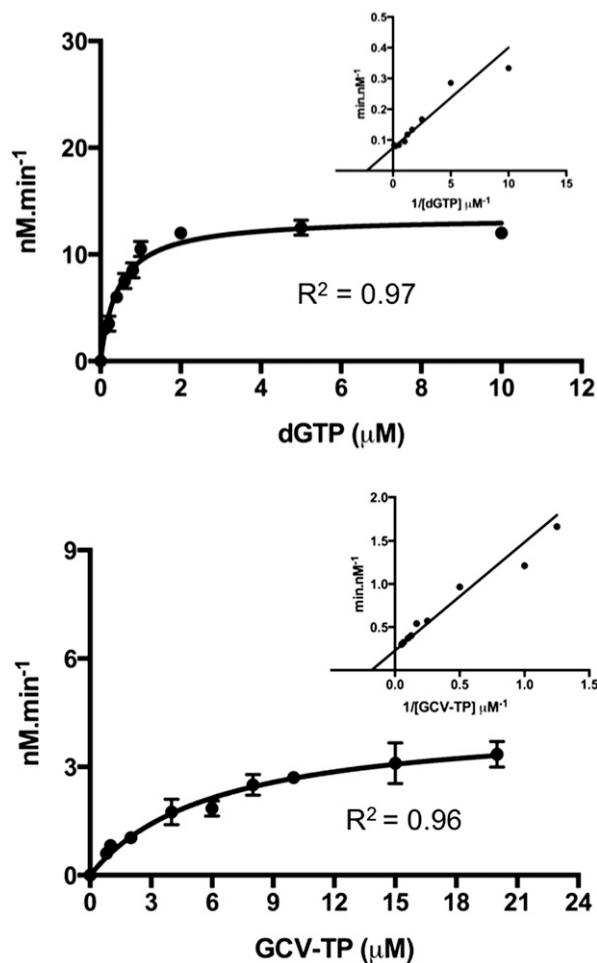

**Fig. S1.** Saturable rates of incorporation of dGTP (*Top*) and GCV-TP (*Bottom*). A large excess of primer template T1 (Fig. 1) was incubated at 37 °C with WT HCMV Pol for 5 min (*Top*) or 15 min (*Bottom*) and the concentrations of dGTP (*Top*) or GCV-TP (*Bottom*) indicated on the x axes. The reactions were analyzed by polyacrylamide gel electrophoresis. The percent of primer templates that were larger (by one nucleotide) in each gel lane was assessed using a phosphor-imager, the values converted to rates, and the data were fit to the Michaelis–Menten equation ( $R^2$  values presented under the curves; error bars indicate SEs) and to Lineweaver–Burk plots (*Insets*).

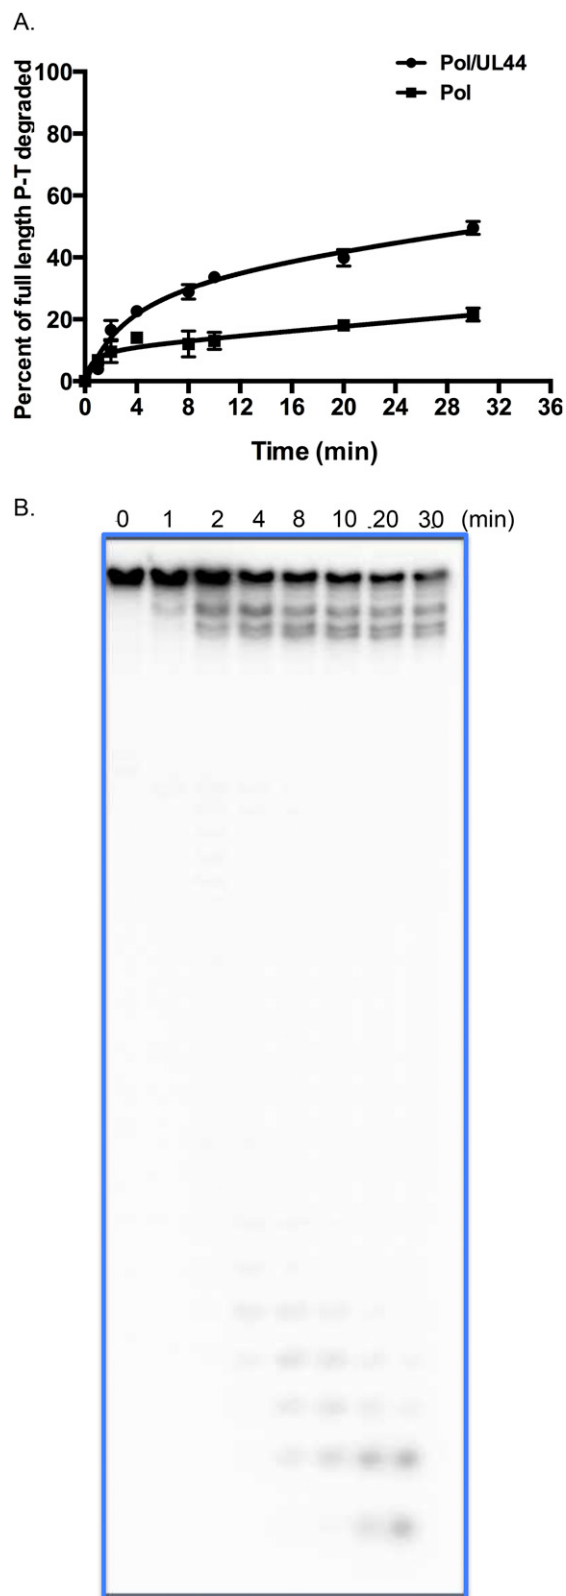

**Fig. S2.** (A) Degradation of primer template by HCMV Pol is more extensive in the presence of UL44. HCMV Pol with (Pol/UL44; filled circles) or without (filled squares) UL44 $\Delta$ C290 was incubated with radiolabeled primer template T2 (Fig. 1) at 37 °C for the times indicated on the x axis. The reactions were analyzed by polyacrylamide gel electrophoresis, and the percent of products that remained full length in each lane was assessed using a phosphorimager. Error bars show SEs. (B) A view of the autoradiogram of the entire polyacrylamide gel from which Fig. 2 was taken. Note that very short products increase with time as the amount of full-length radiolabeled primer template decreases throughout the 30-min time course.

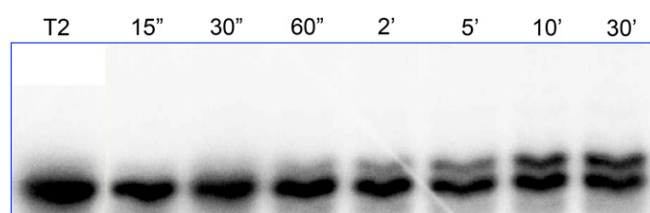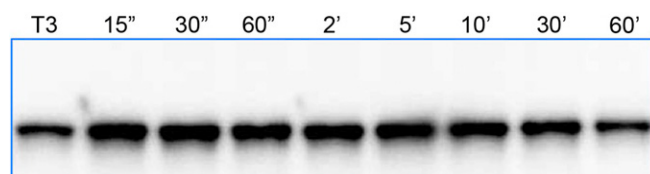

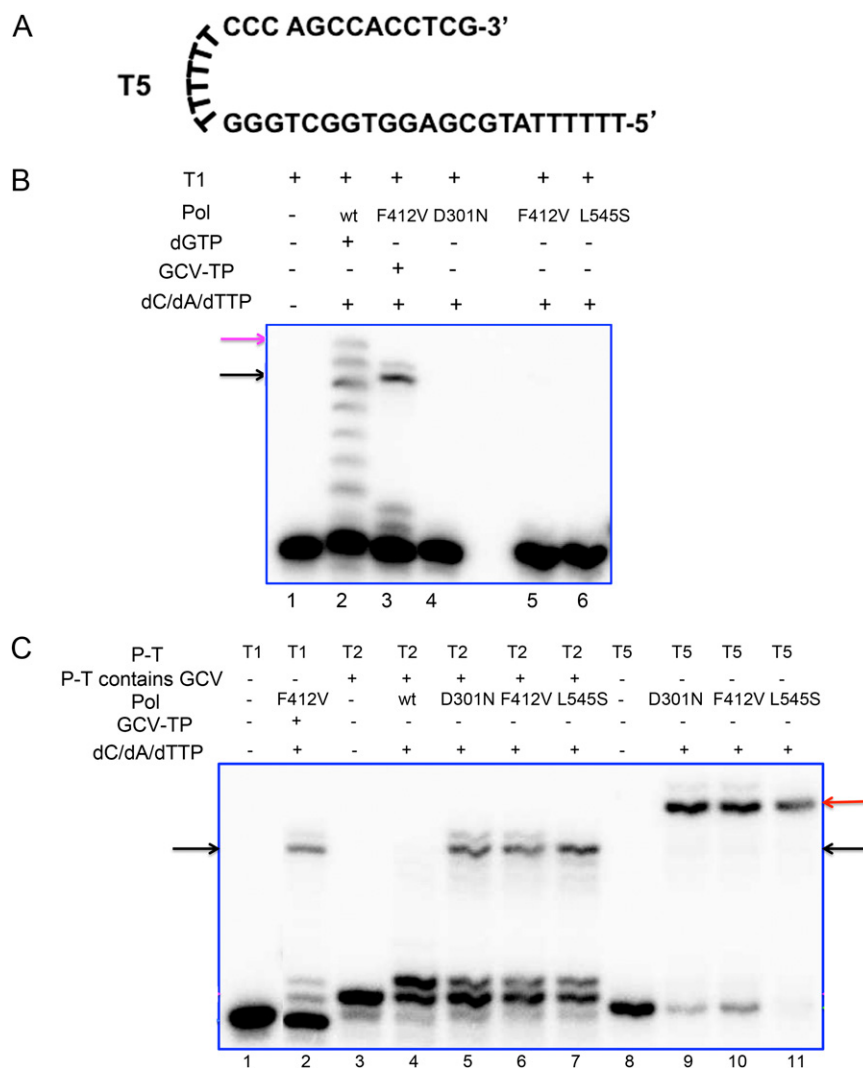

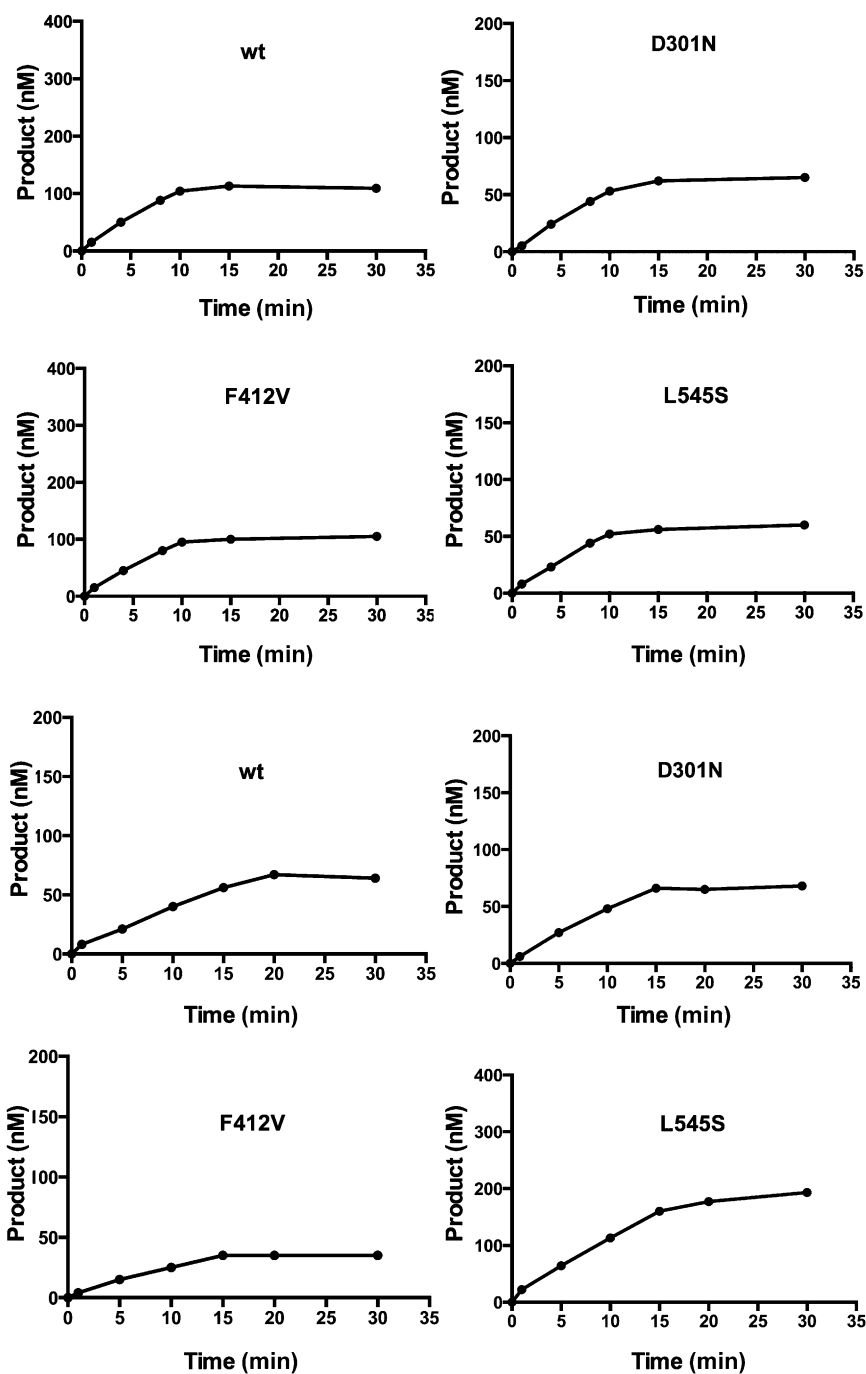

**Fig. S7.** Polymerase reactions are linear for 10 min for dGTP incorporation (top four panels) and for at least 15 min for GCV-TP incorporation (bottom four panels). Each WT and mutant Pol, as indicated within each panel, was incubated with radiolabeled primer template T1 using 0.3  $\mu$ M dGTP (top four panels) or 5  $\mu$ M GCV-TP (bottom four panels) at 37  $^{\circ}$ C for the times indicated. The products (incorporation of one nucleotide into primer template) were analyzed following polyacrylamide gel electrophoresis by a phosphorimager.

**Table S1. Primers used for constructing WT Pol and Pol mutants**

| Enzyme | Template            | Primers                                                                                |
|--------|---------------------|----------------------------------------------------------------------------------------|
| WT Pol | pBAC/AD169 Bacmid   | FW, TTTTTTTCGGTCCGATGTTTTCAACC<br>RV, TTTTTTTCGGACCGTCAACAGGATTC                       |
| D301N  | pGST-WT Pol plasmid | FW, CGATGCCTGTCCTTCAATATCGAGTGCATGAG<br>RV, CTCATGCACTCGATATTGAAGGACAGGCATCG           |
| F412V  | pGST-WT Pol plasmid | FW, GGTTACAACATCAACTCTGTTGACTTGAAGTACATCC<br>RV, GGATGTACTTCAAGTCAACAGAGTTGATGTTGTAACC |
| L545S  | pGST-WT Pol plasmid | FW, CAGGACGCCGTATCGGTGCGCGATCTG<br>RV, CAGATCGCGCACCGATACGGCGTCCTG                     |

FW, forward primers; RV, reverse primers.
